# Supplementary material
Source: PubMed Central journal article supplement (PMC490043)
Supplement: plntcell_tpc.019927_1.pdf [file plntcell_tpc.019927_1.pdf]

## Supplementary data

**Table S1: Constructs with primers and cloning procedures**

It is essential to clarify the nomenclature of functional and non-functional versions of the Hsf consensus binding sites (Nover, 1987; Nover, 1991; Scharf et al., 2001), which comprise at least two palindromic modules of 5 nucleotides: aGAAnnTTCt. The first half is called the head module (H), whereas the second is called the tail module (T). The exact pattern of the nucleotides and the presence of the invariant G and C residues (underlined) are essential. In addition, for a functional module at least one of the two nucleotides indicated by large case letters (AA, TT) must be present. The flanking adenosine and thymine residues (a, t) are frequently found but are not essential. Clusters of HSE modules, which mediate Hsf binding, are defined by an uninterrupted pattern of several modules (see example in construct no.1). The pattern must be precise, but not all modules of a cluster need to be functional. The nomenclature system is best illustrated by the example of the TATA distal HSE cluster in construct 1.

| No                             | Promoter-leader fragment | Putative HSE configuration (underlined; x, any nucleotide) of promoter with <b>TATA</b> box and start codon (ATG) (gene accession number) sequence                                                                                                                                                                                                                                                            |
|--------------------------------|--------------------------|---------------------------------------------------------------------------------------------------------------------------------------------------------------------------------------------------------------------------------------------------------------------------------------------------------------------------------------------------------------------------------------------------------------|
| <b>Gus reporter constructs</b> |                          |                                                                                                                                                                                                                                                                                                                                                                                                               |
| 1                              | <i>GmHsp17*-GUS</i>      | Fragment of soybean Hsp17.3B-CI promoter (Schöffl et al., 1984; Treuter et al., 1993)<br>HSE configuration: 20x THtHtHT 42x HTH 33x <b>TATA</b> box<br>aagcttgatccgtcgaaga <u>agtc</u> cagaatgtttctgaaagttc<br><u>agaaaattct</u> agttttgagattttcagaagtacggcatgatgatg<br>cataaca <u>aggactttctcgac</u> ctgcagtctagagtcgaccgcaag<br>acccttcctc <b>TATAT</b> aaggaagttcatttcatttgagaggacac<br>gctcgagtggccaccATG |

### MycHsp17.6A-CI reporter constructs

For the MycHsp17.6A-CI reporter plasmids, promoter fragments were amplified from Arabidopsis genomic DNA using sequence specific primers and cloned into pRT104-MycHsp17.6A-CI (Kirschner et al., 2000).

|   |                                |                                                                                                                                                                                                                                                                                                                                                                                                                                                                                                                                                                                                                                                                                                                                                                                                                                                                                                                              |
|---|--------------------------------|------------------------------------------------------------------------------------------------------------------------------------------------------------------------------------------------------------------------------------------------------------------------------------------------------------------------------------------------------------------------------------------------------------------------------------------------------------------------------------------------------------------------------------------------------------------------------------------------------------------------------------------------------------------------------------------------------------------------------------------------------------------------------------------------------------------------------------------------------------------------------------------------------------------------------|
| 2 | pRT104-Myc<br>Hsp17.6A-CI      | Kirschner et al., 2000                                                                                                                                                                                                                                                                                                                                                                                                                                                                                                                                                                                                                                                                                                                                                                                                                                                                                                       |
| 3 | CaMV35S<br>promoter            | <p>Potential ASF-1/2 binding motifs are bold-faced and HSEs are underlined:<br/>           97x HT 6x HTHtH 91x TH 42x HTHtHT 29x HT 16x HT<br/>           14x HT 2x <b>TATA</b> box</p> <p>aagcttgcacgctgcagggtcaacatgggtggagcagcagcactctcgtct<br/>           actccaagaatatcaaagatacagtcctcagaagaccagagggctattga<br/> <u>gacttttcaacaaagggtaatatcgggaaacctcctcggattccattgc</u><br/>           ccagctatctgtcacttcatcgaaaggacagtagaaaaggaagatggct<br/>           tctacaaatgccatcattgcgataaaggaaaggctatc<u>gttcaagaatg</u><br/>           cctctaccgacagtggtcccaaagatggacccccaccacgaggaacat<br/> <u>cgtggaaaaagaagacgttccaacc<b>acgt</b>cttcaaagcaagtggatt<b>ga</b></u><br/> <u><b>tgtgata</b>tctccactgacgtaagggatgacgcacaatcccactatcctt</u><br/>           cgcaagacccttcctc<b>TATATA</b>aaggaagttcatttcatttggagaggac<br/>           ctcgagaattcgagctcgggtaccggccgagagaaagagggggATG</p>                                          |
| 4 | AtAct2<br>(actin2)<br>promoter | <p>6x THtH 15x HtH 30x HTHH 48x TH 116x TH 31x HT<br/>           11x TH 5x TH 190x <b>TATA</b> box, (At3g18780)</p> <p>aagcttatgcatgcaagagtcagcatatgtataattgattcagaatcgt<br/> <u>tttgacgagttcggatgtagtagtagccattatttaatgtacatactaa</u><br/> <u>tcgtgaatagtgatgatgaaacattgtatcttattgtataaatatcc</u><br/>           ataaacacatcatgaaagacacttttctttcacgggtctgaattaattatg<br/>           atacaattctaatagaaaacgaattaaattacggttgaattgtatgaaat<br/>           ctaattgaacaagccaaccacgacgacgactaacg<u>ttgcctggattgac</u><br/>           tcggtttaagttaaccactaaaaaacggagctgtcatgtaacacgcgg<br/> <u>atcgagcaggtcacagtcatgaagccatcaaagcaaaagaactaatcca</u><br/>           agggctgagatgattaattagtttaaaaattagttaacacgagggaaaa<br/>           ggctgtctgacagccaggtcacggttatctttacctgtggctgaaatgat<br/>           tcgtgtctgtcgattttaattatTTTTTgaaaggccgaaataaagtt<br/>           gtaagagataaaccgccc<b>TATATA</b>aattcatatatTTTTcctctccgctt</p> |

|   |                     |                                                                                                                                                                                                                                                                                                                                                                                                                                                                                                                                                                                                                                                                                                                                                                                                                                                                                                                                                                                                                                       |
|---|---------------------|---------------------------------------------------------------------------------------------------------------------------------------------------------------------------------------------------------------------------------------------------------------------------------------------------------------------------------------------------------------------------------------------------------------------------------------------------------------------------------------------------------------------------------------------------------------------------------------------------------------------------------------------------------------------------------------------------------------------------------------------------------------------------------------------------------------------------------------------------------------------------------------------------------------------------------------------------------------------------------------------------------------------------------------|
|   |                     | tgaattgtctcgttgctcctcactttcatcagccgttttgaaatctcc<br>ggcgacttgacagagaagaacaaggaagaagacctcgagtggccacATG                                                                                                                                                                                                                                                                                                                                                                                                                                                                                                                                                                                                                                                                                                                                                                                                                                                                                                                                 |
| 5 | AtHsfC1<br>promoter | 30x HT 133x THtH 50x THtHTH 17x HT 13x ThTHHtHT<br>44x TH 167x TH 115x <b>TATA</b> box (At3g24520, Nover et<br>al., 2001)<br>cagctgttttaagttaaaatctgaatacacagcatgttccttctaacgt<br>tttttaacataattgtaaactaaagaaaaattataatataataaattaa<br>attataccctctctattcattgtagaagatttgtttgtttcaccaaag<br>tgttttttttttataagttgctctcactcttgagagttttggagatatt<br>tgaagaggacgaggttcttttgtaaaaagtgaagaaacaaatcatgt<br><u>caagaattagaaagaaatcatgacaaataattttgtttgtagaaatt</u><br><u>acaaatgaatcatagatatccttctaattcgggatcggaaaccagttga</u><br><u>aaaatcgatggactaagctttctatattgggactagcttacccttagaa</u><br><u>ttagtcaagcagcttaaatcatctatgacttaaaattataattaagaaa</u><br>aaacaatgcctaaatatgcatatatttcaaagtatcacataacttg<br>acataagaaaatataaacaacaaaaggcaaaaagacctgaaagc<br>ttagaggcacacctgcataggtcccacagttcactcgtgacaccgtaaa<br>aggcaaacacgaaccgccagttatcacaaaagcaagccacgtcaa<br>tatagtctcactgtcaactaacttaacttactatttcacatctcatt<br>ttcctatcttt <b>TATATA</b> aaccctccaggtcctctttaatttctttacca<br>ccaccaacaacaacatataaaccataaggaaaacagagctcgagtggc<br>caccATG |
| 6 | AtDnaj<br>promoter  | 46x HTH 58x TH 16x TH 16x THtH 13x TH 118x HT<br>111x TH 2x HT 5x HT 281x TH 72x HT 10x <b>TATA</b> box<br>(At4g36040)<br>gtcgacttttcttctatttgatgtagcaaaagaaaaataaac <u>cg</u><br><u>ctttccttgattataacattgacaaccattagtaattctattataataag</u><br>atacatttgaaaacatttatattacttgatcatttgatattttatcgtaa<br><u>tctcgtacaaacaccgtagttggtatcatgaaattctgtgagctaaga</u><br>aaacaatttctcacgaatcaaatttgcagattaccattggctttttata<br>ttccattcctatagtaagaaaataataaagcacataaatataaaaa<br>aatgtttgatggtggaggcaatctttaatacagtagagacttttctc<br>aatcttctaaaaatctatttctgtcttctcaatatccaacaacaatac<br>atggtccaaattacgtctccatacaccaattatattttttataaataaa                                                                                                                                                                                                                                                                                                                                                                                                       |

|   |                  |                                                                                                                                                                                                                                                                                                                                                                                                                                                                                                                                                                                                                                                                                                                                                                                                                                                                                                                                                         |
|---|------------------|---------------------------------------------------------------------------------------------------------------------------------------------------------------------------------------------------------------------------------------------------------------------------------------------------------------------------------------------------------------------------------------------------------------------------------------------------------------------------------------------------------------------------------------------------------------------------------------------------------------------------------------------------------------------------------------------------------------------------------------------------------------------------------------------------------------------------------------------------------------------------------------------------------------------------------------------------------|
|   |                  | <p>agaaaaaaaaat<u>ctactc</u>gtaata<u>agaagatt</u>ctaattt<u>cg</u>aatttcca<br/> ccttaaaataactcttctgctaagaaaattaaaaaaaaaaaaaatgat<br/> aaataactaaaaacaaaacgtgattagtatttctgtgcaaattaaata<br/> ttggattcctttggcattaatatatttttgtaagaatatgttaaaatga<br/> caattacagccacagaacaatttggccactatgaataatatcttacgta<br/> ctacattcttatctcttctgcaattatttccccaaactggataagccttt<br/> tttatctgactcagatcacaggatccgacccgactttt<u>accgacccg</u>t<br/> aacttaatcccctatatccgtttttagtatgtaattaataaactattcaa<br/> aatcttaattaaccaattaat<u>gactaat</u>cgctcttcgccc<b>TATAAAT</b>ta<br/> aaccctccattacctttcttcttcaatctttccctctcctcctcgaac<br/> aaaacaacaacgcagagaaactcaaaactcgaaaacgtttcctcgag<br/> tggccaccATG</p>                                                                                                                                                                                                                                                                   |
| 7 | AtHsc70 promoter | <p>177x THtH 8x HtH 10x HT 43x HT 31x HT 95x HTH 50x<br/> HT 2x HT 18x <b>TATA</b> box (At5g02500)</p> <p>aagctttgaaatagaagaaaaagcctttttccttttgacaacaacatat<br/> aaaatcatactcccattaaaaagattttaatgtaaaattctgaatataa<br/> gatattttttacaacaacaacaaaaatatttatttttttctttttta<br/> cagcaacaagaaggaaaaactttttttttt<u>gtcaagaaaaggggagatt</u><br/> atgtaaac<u>agataaaaacagggaaa</u>ataactaac<u>gaactctct</u>taatta<br/> acatcttcaaataaggaaaattatgatccgcatatttaggaagatcaat<br/> gcattaaaacaacttgcacgtggaaagagagactata<u>cgctcc</u>acacaa<br/> gttgcactaatggtacctctcacaaccaatcaaaatactgaataatgc<br/> caacgtgtacaaattagggttttacctcacaaccat<u>cg</u>aacattct<u>cg</u>a<br/> <u>acatttt</u>aaacagcctggcgccatagatctaaactctcatcgaccaat<br/> tttt<u>gaccgtccgatgg</u>aaactctagcctcaaccctaaactc<b>TATATA</b>a<br/> agaaatctttccttcgttattgcttaccatacaaaccttagccgcc<br/> ttattcgtcttcttcgttctctagttttttcctcagtctctgttcttag<br/> atccctttagtatttccaaatctcgagtggccaccATG</p> |
| 8 | AtHsp70 promoter | <p>129x TH 78x HtHtHtHtHtHtH 17x HtH 47x THtHTHT 82x<br/> HT 2x HT 108x THTH 54x THT 20x <b>TATA</b> box<br/> (At1g16030)</p> <p>aagcttaaagcaatcgagttaaaacgagaaattcagtttctttaattct<br/> cacagagaacctcagagatgaactatactaccgagcatttctctgggt<br/> ttcgtcggacaagctgtagatgattaccagat<u>cg</u>ggaactcaataat</p>                                                                                                                                                                                                                                                                                                                                                                                                                                                                                                                                                                                                                                                |

|                                                                         |                                               |                                                                                                                                                                                                                                                                                                                                                                                                                                                                                                                                                                                                                                                                                                                                                                                                |
|-------------------------------------------------------------------------|-----------------------------------------------|------------------------------------------------------------------------------------------------------------------------------------------------------------------------------------------------------------------------------------------------------------------------------------------------------------------------------------------------------------------------------------------------------------------------------------------------------------------------------------------------------------------------------------------------------------------------------------------------------------------------------------------------------------------------------------------------------------------------------------------------------------------------------------------------|
|                                                                         |                                               | <p>ctgaatatcaacatcaaaacaaaaaggctaaaattaactgaaaaatc<br/> cactagcaaccagggttatgaaagaaagtttttagtaccataggagacgc<br/> agagtgagagttggatcagaaatgagatcgacagagttattgttacgga<br/> ccacgtgaaatccgaagatcagaaataaccagtaatcacataaacgc<br/> aaaagcccccaagttgatatcgtgataactaacggagatttctggattc<br/> ttcttctccttcgcctctttcatggcttttcttctcgtcttcgaaat<br/> cacagaacaagtgaagaaagaagacgtaaacaaaatattgaaaatcctc<br/> cagaacttacactgggccttttattctatatacgggcctacaagtttat<br/> accatatgggctttaataggccatttaattatcaagcggtcgccggag<br/> ataaaatatatcccggtcggatccagaactctcttgtagcgtttgagc<br/> cgatttctccacctttccacaatcccctgggttggtgccacgacctttt<br/> tctcgaaatgtctcgttcctctcgtcggattcg<b>TATATA</b>tagcttcttc<br/> catcgtttccgattcttcatcaaacagataaacaacaaaagaaatcga<br/> aaaacctcacttccaatttcattcaattactcgagtgccaccATG</p> |
| <b>pRT based reporter constructs containing Ds-Red/Gfp as reporters</b> |                                               |                                                                                                                                                                                                                                                                                                                                                                                                                                                                                                                                                                                                                                                                                                                                                                                                |
| 9                                                                       | <i>AtHsc70</i><br><i>P/L-DsRED</i>            | Subcloning of SalI-XbaI fragment of Ds-red ORF (clonetech) into pRT- <i>AtHsc70-P/L-MycHsp17.6ACI</i>                                                                                                                                                                                                                                                                                                                                                                                                                                                                                                                                                                                                                                                                                          |
| 10                                                                      | <i>AtHsp70</i><br><i>P/L-GFP</i>              | Subcloning of NcoI-XbaI fragment of Gfp ORF (clonetech) into pRT- <i>AtHsp70-P/L-MycHsp17.6ACI</i>                                                                                                                                                                                                                                                                                                                                                                                                                                                                                                                                                                                                                                                                                             |
| <b>pRT based Hsf expression plasmids</b>                                |                                               |                                                                                                                                                                                                                                                                                                                                                                                                                                                                                                                                                                                                                                                                                                                                                                                                |
| 11                                                                      | LpHsfA1                                       | Treuter et al., 1993                                                                                                                                                                                                                                                                                                                                                                                                                                                                                                                                                                                                                                                                                                                                                                           |
| 12                                                                      | LpHsfA1-M5<br>(R93>D)<br>(DNA binding mutant) | <p>1.F:5'-gacgcacaatcccacta-3'<br/> 1.R:5'-cagctgggtcgacaaagctggaaaagttattatgc-3'<br/> 2.F:5'-agctttgtcgaccagcttaataacttatgg-3'<br/> 2.R:5'-cctgaagagtgactcctgaaacacg-3'</p> <p>(PCR amplification of 5' fragment of HsfA1 with mutation of R93 using primers 1.F and 1.R; triple ligation of 5' fragment with 3' fragment (Pr. 2.F-2.R) into pRT101)</p>                                                                                                                                                                                                                                                                                                                                                                                                                                      |
| 13                                                                      | LpHsfA1<br>$\Delta$ HRA/B                     | HsfA1 without oligomerization domain (aa 23-161,VD,239-527) generated by subcloning of SalI-XbaI fragment of pRTHsfA1.71 into pRTHsfA1.8 (Mishra et al., 2002)                                                                                                                                                                                                                                                                                                                                                                                                                                                                                                                                                                                                                                 |
| 14                                                                      | LpHsfA1-M3                                    | NLS mutant of HsfA1 (Lyck et al., 1997)                                                                                                                                                                                                                                                                                                                                                                                                                                                                                                                                                                                                                                                                                                                                                        |

|    |                                             |                                                                                                                                                                                                                                                        |
|----|---------------------------------------------|--------------------------------------------------------------------------------------------------------------------------------------------------------------------------------------------------------------------------------------------------------|
| 15 | LpHsfA1ΔC394                                | HsfA1 with deletion of C-terminal activation domain (Treuter et al., 1993)                                                                                                                                                                             |
| 16 | LpHsfA1-A7                                  | Inactive HsfA1 with hepta alanine substitutions of aromatic and hydrophobic residues in AHA1 and AHA2 motifs (451-IDWQSGLL 12aa DPFWEKFL->451-IDAQSGAA 12aa DPAAEKAA) (Döring et al., 2000)                                                            |
| 17 | LpHsfA1<br>(aa23-394)<br>xGal4AD(aa768-881) | F:5'-tgggtgctagcgc <u>ccaattt</u> taatacaagtg <sup>3'</sup><br>R:5'-gtatctacgattcatagatctctgc-3'<br>PCR amplification of Gal4AD using the indicated forward and reverse primers and cloning into pRT-LpHsfA1c394 via NheI-XbaI                         |
| 18 | LpHsfA1<br>(aa23-394)<br>xVP16(aa412-490)   | F:5'-gactggctagcaccgccccattaccgacg-3'<br>R:5'-cacacattattctggag-3'<br>PCR amplification of VP16AD using the indicated forward and reverse primers and cloning into pRT-LpHsfA1c394 via NheI-XbaI                                                       |
| 19 | Gal4DBD(aa1-147)xLpHsfA1-CTD(aa314-527)     | F:5'-cctgaaagtttctc <u>gagtggtgatg</u> ttca-3'<br>R:5'-atatagagcggc <u>cgcttg</u> cg <sup>3'</sup><br>PCR amplification of LpHsf C-terminal fragment using the indicated forward and reverse primers and cloning into pBI-Gal4DBD via XhoI-NotI        |
| 20 | LpHsfA2                                     | Treuter et al., 1993                                                                                                                                                                                                                                   |
| 21 | LpHsfB1                                     | Treuter et al., 1993                                                                                                                                                                                                                                   |
| 22 | LpHsfB1-M4<br>(KH(54,55)>EL)                | DNA binding mutant (Boscheinen et al., 1997)                                                                                                                                                                                                           |
| 23 | LpHsfB1ΔHRA/B                               | HsfB1 without oligomerization domain (aa 1-142, VD,214-301)<br>F:5'-tccagcgc <u>tcgacgag</u> ttggtcaaggaggttg-3'<br>R:5'-cacacattattctggag-3'<br>Cloning of the PCR product into pRTHsfB1.25 (containing a unique SalI site at 144,145) via SalI-XbaI. |
| 24 | LpHsfB1ΔNLS                                 | HsfB1 without NLS motif (aa 1-213,VD,268-301)                                                                                                                                                                                                          |

|    |                                   |                                                                                                                                                                                                            |
|----|-----------------------------------|------------------------------------------------------------------------------------------------------------------------------------------------------------------------------------------------------------|
|    |                                   | <p>F:5′-gagaat<u>gtcgcac</u>acttgtggtggacgtgg-3′</p> <p>R:5′-cacacattattctggag-3′</p> <p>Cloning of the PCR product into pRTHsfB1.26 (containing a unique SalI site at codons 213,214) via SalI-XbaI.</p>  |
| 25 | LpHsfB1ΔCC198                     | Treuter et al., 1993                                                                                                                                                                                       |
| 26 | LpHsfB1ΔC294                      | Treuter et al., 1993                                                                                                                                                                                       |
| 27 | LpHsfB1ΔC286                      | Treuter et al., 1993                                                                                                                                                                                       |
| 28 | LpHsfB1ΔC274                      | Treuter et al., 1993                                                                                                                                                                                       |
| 29 | LpHsfB1<br>(WM286/7>SR)           | <p>F:5′-ggactataatggtcc<u>ctcgcag</u>gaaaatgtcttcg-3′</p> <p>R:5′-cacacattattctggag-3′</p> <p>PCR mutagenesis of C-terminal fragment of HsfB1 in pRT-LpHsfB1, cloning via XhoI-XbaI</p>                    |
| 30 | LpHsfB1<br>(Y282>A)               | <p>F:5′-atgaaaactg<u>tcgcacg</u>ctaattggtccttgg-3′</p> <p>R:5′-cacacattattctggag-3′</p> <p>PCR mutagenesis of C-terminal fragment of HsfB1 in pRT-LpHsfB1, cloning via SalI-XbaI</p>                       |
| 31 | LpHsfB1<br>(GK274/5>VD)           | <p>F:5′-acttgtggtggacgtg<u>tcgcac</u>atgatgaaaactgtg-3′</p> <p>R:5′-cacacattattctggag-3′</p> <p>PCR mutagenesis of C-terminal fragment of HsfB1 in pRT-LpHsfB1, cloning via SalI-XbaI</p>                  |
| 32 | LpHsfB1<br>(K275>Q)               | <p>F:5′-gagaat<u>gtcgcac</u>acttgtggtggacgtgg<b>ccag</b>atgatgaaaaac-3′</p> <p>R:5′-cacacattattctggag-3′</p> <p>PCR mutagenesis of C-terminal fragment of HsfB1 in pRT-LpHsfB1, cloning via SalI-BamHI</p> |
| 33 | LpHsfB1Δ272-<br>279               | <p>F:5′-aaaactg<u>tcgcac</u>tataatggtccttgg-3′</p> <p>R:5′-cacacattattctggag-3′</p> <p>Cloning via SalI-XbaI into pRTB1.23, containing a unique SalI site at 271,272</p>                                   |
| 34 | LpHsfB1<br>(GRGK272-<br>275>LWTT) | <p>F:5′- gagaatg<u>tcgcac</u>acttgtggt<b>ctttggac</b>tac<b>cc</b>atgatgaaaactgtgg-3′</p> <p>R:5′-cacacattattctggag-3′</p> <p>PCR mutagenesis of C-terminal fragment of HsfB1</p>                           |

|                                                                         |                                                     |                                                                                                                                                                                                                                                                       |
|-------------------------------------------------------------------------|-----------------------------------------------------|-----------------------------------------------------------------------------------------------------------------------------------------------------------------------------------------------------------------------------------------------------------------------|
|                                                                         |                                                     | in pRT-LpHsfB1, cloning via SalI-XbaI                                                                                                                                                                                                                                 |
| 35                                                                      | LpHsfB1<br>(GRGK272-275><br>GKGR)                   | F:5'-gagaatg <u>tcgacac</u> acttgtggtgga <b>aaagg</b> tcgaatgat<br>gaaaactgtgg-3'<br>R:5'-cacacattattctggag-3'<br>PCR mutagenesis of C-terminal fragment of HsfB1<br>in pRT-LpHsfB1, cloning via SalI-XbaI                                                            |
| 36                                                                      | LpHsfB1<br>(K278>R)                                 | F:5'-acttgtg <u>tcgaccg</u> cggtaaaatgatg <b>cg</b> tactgtgg-3'<br>R:5'-cacacattattctggag-3'<br>PCR mutagenesis of C-terminal fragment of HsfB1<br>in pRT-LpHsfB1, cloning via SalI-BamHI                                                                             |
| 37                                                                      | LpHsfB1 (aa1-<br>198)xNtHsfB1<br>(aa204-298)        | F:5'-tgatc <u>gctagc</u> atcattagccaaggaacctc-3'<br>R:5'-atttggct <u>tagatc</u> ttcagttacagaccttggtac-3'<br>PCR amplification of NtHsfB1 CTD using the<br>indicated forward and reverse primers and<br>cloning into pRT-LpHsfB1c198 via NheI-XbaI                     |
| 38                                                                      | LpHsfB1 (aa1-<br>198)xGmHsfB1<br>(aa204-282)        | F:5'-agatc <u>gctagc</u> atcatgcggcaaggaag-3'<br>R:5'-gagcct <u>ctagatt</u> cagttgcaaaccctggtg-3'<br>PCR amplification of GmHsfB1 CTD using the<br>indicated forward and reverse primers and<br>cloning into pRT-LpHsfB1c198 via NheI-XbaI                            |
| 39                                                                      | LpHsfB1 (aa1-<br>198)xAtHsfB1<br>(aa200-284)        | F:5'-ccggaag <u>ctagcg</u> ataaaaatgadc-3'<br>R:5'-cacacattattctggag-3'<br>PCR amplification of AtHsfB1 CTD using the<br>indicated forward and reverse primers and<br>cloning into pRT-LpHsfB1c198 via NheI-XbaI                                                      |
| 40                                                                      | Gal4DBD(aa1-<br>147)xLpHsfB1-<br>CTD(aa200-<br>301) | F:5'-gttgcaccggata <u>agatc</u> taccgtatcatgagcc-3'<br>R:5'-attagag <u>cgccgct</u> cagttacaaaccttgctg-3'<br>PCR amplification of C-terminal fragment of<br>LpHsfB1 using the indicated forward and reverse<br>primers and cloning into pBI-Gal4DBD via BglII-<br>NotI |
| <b>pRT based vectors containing Human and At-CBP and TGA constructs</b> |                                                     |                                                                                                                                                                                                                                                                       |
| 41                                                                      | HsCBP                                               | Subcloning of SacI-NdeI fragment from pcDNA3-CBP<br>(kindly provided by M. Rosenfeld, UCSD) into                                                                                                                                                                      |



|                                                                                                                    |                          |                                                                                                                                                                                                                                                                       |
|--------------------------------------------------------------------------------------------------------------------|--------------------------|-----------------------------------------------------------------------------------------------------------------------------------------------------------------------------------------------------------------------------------------------------------------------|
|                                                                                                                    |                          | pRT101                                                                                                                                                                                                                                                                |
| 42                                                                                                                 | AtCBP (HAC1)             | 1.F:5'-gcctaaggcaagactcgcgagaaaaag-3'<br>1.R:5'-aatttcccgggcctagggttacctgcaacgaggtacatggc-3'<br>(XhoI/BlnI-XbaI/At-cDNA/pRT101)=pRT101-fragCTD<br>2.F:5'-ggggcaggtgtcgaccctaggactatgtcgggg-3'<br>2.R:5'-ctttttctcgagtcttgccttaggc-3'<br>(XhoI/At-cDNA/pRT101-fragCTD) |
| 43                                                                                                                 | HAC1-NTD<br>(aa1-988)    | F:5'-ggggcaggtgtcgaccctaggactatgtcgggg-3'<br>R:5'-gtcgccccgggattccctagggttatggaatacaaaaagtaatg-3'<br>PCR amplification of At-cDNA using the indicated forward and reverse primers and cloning of PCR products into pRT101 via BlnI-XbaI                               |
| 44                                                                                                                 | HAC1-CTD<br>(aa984-1654) | F: 5'-caccgtaggagcgtcgaccctaggatgtacttttgtattcc-3'<br>R: 5'-aatttcccgggcctagggttacctgcaacgaggtacatggc-3'<br>PCR amplification of At-cDNA using the indicated forward and reverse primers and cloning of PCR products into pRT101 via BlnI-XbaI                        |
| <b>pJC based bacterial vectors for expression of N and C-terminal His tagged proteins</b> (Clos and Brandau, 1994) |                          |                                                                                                                                                                                                                                                                       |
| 47                                                                                                                 | LpHsfA1 -<br>CHis6       | Subcloning of EcoRI-ApaI fragment from pRT101-HsfA1LS into pJC20                                                                                                                                                                                                      |
| 48                                                                                                                 | LpHsfB1-<br>CHis6        | F: 5'-aagaggcatatgtcgcaagaacagcg-3'<br>R: 5'-catagggatccacgcggaaccaagttacaaaccttgcgtgctt-3'<br>PCR amplification of B1 cDNA using the indicated forward and reverse primers and cloning of PCR products into pJC40 via NdeI-XbaI                                      |
| 49                                                                                                                 | NHis6-At<br>HAC1NTD      | F: 5'-ggggcaggtgtcgaccctaggactatgtcgggg-3'<br>R: 5'-gtcgccccgggattccctagggttatggaatacaaaaagtaatg-3'<br>PCR amplification of At-cDNA using the indicated                                                                                                               |

|                                                                                                                                                        |                                  |                                                                                                                                                                                                                                      |
|--------------------------------------------------------------------------------------------------------------------------------------------------------|----------------------------------|--------------------------------------------------------------------------------------------------------------------------------------------------------------------------------------------------------------------------------------|
|                                                                                                                                                        |                                  | forward and reverse primers and cloning via SalI/XhoI-XbaI                                                                                                                                                                           |
| 50                                                                                                                                                     | NHis6-At<br>HAC1CTD              | F: 5'-caccgtaggagcgtcgacc <u>cctaggat</u> gtacttttgtattcc-3'<br>R: 5'-aatttcccggg <u>cctagg</u> ttacctgcaacgaggtacatggc-3'<br>PCR amplification of At-cDNA using the indicated forward and reverse primers and cloning via BlnI-XbaI |
| <b>pβstop based vectors for in vitro transcription</b>                                                                                                 |                                  |                                                                                                                                                                                                                                      |
| pβstop based vectors containing WT and mutant HsfB1 for in vitro transcription-translation (vector kindly provided by Mr. Michael Jantzen, UC Berkely) |                                  |                                                                                                                                                                                                                                      |
| 51                                                                                                                                                     | LpHsfB1                          | Subcloning of XhoI-XbaI fragment of pRT-HsfB1 into pβstop                                                                                                                                                                            |
| 52                                                                                                                                                     | LpHsfB1<br>Δ272-279              | Subcloning of XhoI-XbaI fragment of pRT-HsfB1Δ272-279 into pβstop                                                                                                                                                                    |
| <b>pcDNA3 based animal expression vectors</b>                                                                                                          |                                  |                                                                                                                                                                                                                                      |
| All Hsf encoding fragments from the corresponding pRT vectors were cloned via XhoI/XbaI into pcDNA3                                                    |                                  |                                                                                                                                                                                                                                      |
| 53                                                                                                                                                     | LpHsfA1                          | Heerklotz et al., 2001                                                                                                                                                                                                               |
| 54                                                                                                                                                     | LpHsfA1-M5                       | Subcloned from construct no. 12                                                                                                                                                                                                      |
| 55                                                                                                                                                     | LpHsfA1-A7                       | Subcloned from construct no. 16                                                                                                                                                                                                      |
| 56                                                                                                                                                     | LpHsfB1                          | Subcloned from construct no. 21                                                                                                                                                                                                      |
| 57                                                                                                                                                     | LpHsfB1-M4                       | Subcloned from construct no. 22                                                                                                                                                                                                      |
| 58                                                                                                                                                     | LpHsfB1Δ272-279                  | Subcloned from construct no. 33                                                                                                                                                                                                      |
| 59                                                                                                                                                     | LpHsfB1<br>(GRGK272 - 275> GKGR) | Subcloned from construct no. 35                                                                                                                                                                                                      |
| 60                                                                                                                                                     | HsCBP                            | pcDNA3-HsCBP plasmid was kindly provided by M. Rosenfeld, UC San Diego                                                                                                                                                               |
| 61                                                                                                                                                     | HsFlagCBP                        | pcDNA3-HsFlagCBP plasmid was kindly provided by E.Pfitzner, Georg Speyer Haus, Frankfurt                                                                                                                                             |
| 62                                                                                                                                                     | pGmHsp17-                        | Luciferase reporter for mammalian cells with                                                                                                                                                                                         |

|                                                                                                                                                                                                                                                                                                                     |                          |                                                                                                                                                                                            |
|---------------------------------------------------------------------------------------------------------------------------------------------------------------------------------------------------------------------------------------------------------------------------------------------------------------------|--------------------------|--------------------------------------------------------------------------------------------------------------------------------------------------------------------------------------------|
|                                                                                                                                                                                                                                                                                                                     | <i>LUC</i>               | plant Hsp17.3B promoter fragment; Heerklotz et al., 2001                                                                                                                                   |
| <b>Vecotrs containing inverted repeats</b>                                                                                                                                                                                                                                                                          |                          |                                                                                                                                                                                            |
| Parts of the ORFs, were cloned into pJawohl vectors using the "Gateway Technology" (Invitrogen). Cloning into pJawohl vector creates inverted repeats of the same domain separated by a neutral intron. This inverted repeat containing vector when transformed into protoplasts generates sequence specific dsRNA. |                          |                                                                                                                                                                                            |
| 63                                                                                                                                                                                                                                                                                                                  | pIR-AthHAC1              | HAT domain (aa 1173-1611) of At-HAC1                                                                                                                                                       |
| 64                                                                                                                                                                                                                                                                                                                  | pIR-LpHsfA1              | CTD (aa 351-527) of Lp-HsfA1                                                                                                                                                               |
| 65                                                                                                                                                                                                                                                                                                                  | pIR-LpHsp<br>17CII       | Full length ORF of Lp-Hsp17CII                                                                                                                                                             |
| <b>Probes used for EMSA</b>                                                                                                                                                                                                                                                                                         |                          |                                                                                                                                                                                            |
| 66                                                                                                                                                                                                                                                                                                                  | GmHsp17.3B-<br>CI-WT     | THtHtHT50x <b>TATA</b> box<br>tacgccaagcttggatccgctcgaaga <u>agtccagaatg</u> tttctgaaagtt<br><u>tcagaaaattctag</u> ttttgagattttcagaagtacggccggtcgaccgc<br>aaaacccttactc <b>TATAT</b> aagg  |
| 67                                                                                                                                                                                                                                                                                                                  | GmHsp17.3B-<br>CI-mutant | thtHtHT50x <b>TATA</b> box<br>tacgccaagcttggatccgctcgaattc <u>g</u> ttttaaagtgtttaatattggt<br><u>tcagaaaattctag</u> ttttgagattttcagaagtacggccggtcgaccgc<br>aaaacccttactc <b>TATAT</b> aagg |
